# Supplementary material for: Response of reef corals on a fringing reef flat to elevated suspended-sediment concentrations: Molokaʻi, Hawaiʻi
Source: PeerJ. 2014 Dec 18;2:e699. doi: 10.7717/peerj.699 (PMC4304865; doi:10.7717/peerj.699)
Supplement: Supplemental Information 2 — CRAMP dataset includes coral recruitment, growth, and macroalgal composition. [file peerj-02-699-s002.xls]

## Sheet: recruitment plates
station	deployment	recovery	time in field (days)
E-100	2007-02-02	2007-10-23	263		A	Top Outer 1
E-250	2007-02-02	2007-10-23	263		B	Top Inner 1
E-400	2007-02-05	2007-10-24	262		C	Bottom Outer 1
E-550	2007-02-05	2007-10-24	262		D	Bottom Inner 1
E-700	2007-02-05	2007-10-24	262		E	Top Outer 2
					F	Top Inner 2
H-100	2007-02-03	2007-10-25	264		G	Bottom Outer 2
H-250	2007-02-03	2007-10-25	264		H	Bottom Inner 1
H-400	2007-02-03	2007-10-25	264
H-550	2007-02-03	2007-10-26	265
H-700	2007-02-03	2007-10-26	265
E-100	Recruits	E-250	Recruits	E-400	Recruits	E-550	Recruits	E-700	Recruits
A	0	A	0	A	0	A	0	A	0
B	0	B	0	B	0	B	0	B	0
C	0	C	0	C	0	C	1 Montipora	C	0
D	0	D	0	D	0	D	0	D	0
E	0	E	0	E	0	E	0	E	0
F	0	F	0	F	0	F	0	F	0			G bottom outer 1 mont, 1 poc
G	0	G	0	G	0	G	0	G	0			J bottom outer H700 1 mont
H	0	H	0	H	0	H	0	H	0
H-100		H-250		H-400		H-550		H-700
A	0	A	0	A	0	A	0	A	0
B	0	B	0	B	0	B	0	B	0
C	0	C	0	C	0	C	1 Montipora	C	1 Porites	1Pocillopora
D	0	D	0	D	0	D	0	D	0
E	0	E	0	E	0	E	0	E	0
F	0	F	0	F	0	F	1 Porites	F	0
G	0	G	0	G	0	G	0	G	0
H	0	H	0	H	0	H	0	H	0

## Sheet: Bouyant wts A-J
		39114			South Moloka'i
number	site	initial weight	end weight	growth	species	location	% Change			number	site	initial weight	end weight	growth	species	location	location	% Change	wire	0.8
1	A	17	23.6	6.6	m	H400	38.8235			1	B	89.7	102.2	12.5	m		H250	13.9353	tag	0.1
2	A	13.4	20.9	7.5	m	H400	55.9701			2	B	35.4	41.3	5.9	m		H250	16.6667
3	A	40.7	48.8	8.1	m	H400	19.9017			3	B	15.8			m		H250
4	A	35.7	51.5	15.8	m	H400	44.2577			4	B	52.3	82.9	30.6	m		H250	58.5086
5	A	23.9	32.6	8.7	m	H400	36.4017			5	B	40.1	49.8	9.7	m		H250	24.1895
6	A	40.5	118	77.5	m	H400	191.358			6	B	48.6	65.3	16.7	m		H250	34.3621
7	A	8.9	13.3	4.4	m	H400	49.4382			7	B	51.7	61.2	9.5	m		H250	18.3752
8	A	72.3	90.4	18.1	m	H400	25.0346			8	B	19.6	25.8	6.2	m		H250	31.6327
9	A	35.3	56.7	21.4	m	H400	60.6232			9	B	23.7	28.2	4.5	m		H250	18.9873
10	A	42.1	57	14.9	m	H400	35.3919			10	B	72.6	83.6	11	m		H250	15.1515
11	A	26.3	33.2	6.9	m	H400	26.2357			11	B	24.5	31.5	7	m		H250	28.5714
12	A	24	42.1	18.1	m	H400	75.4167			12	B	14.6	20.1	5.5	m		H250	37.6712
13	A	25.3	36.9	11.6	m	H400	45.8498			13	B	34.2	40.7	6.5	m		H250	19.0058
14	A	21.8	41.8	20	m	H400	91.7431			14	B	37.6	41.8	4.2	m		H250	11.1702
15	A	14	20.4	6.4	m	H400	45.7143			15	B	24.2	34.5	10.3	m		H250	42.562
16	A	35.8	44.4	8.6	m	H400	24.0223			16	B	28.5	38.2	9.7	m		H250	34.0351
17	A	70.6	88.6	18	m	H400	25.4958			17	B	9.7	11.1	1.4	m		H250	14.433
18	A	73.8	91.4	17.6	m	H400	23.8482			18	B	44.7	53.5	8.8	m		H250	19.6868
19	A	44.4	52.4	8	m	H400	18.018			19	B	16.5	22.4	5.9	m		H250	35.7576
20	A	70.5	89.9	19.4	m	H400	27.5177			20	B	32.7	38.8	6.1	m		H250	18.6544
21	A	54.6	77.9	23.3	p	H400	42.674			21	B	34	42.2	8.2	p		H250	24.1176
22	A	48.4	64.8	16.4	p	H400	33.8843			22	B	101.9	125.5	23.6	p		H250	23.16
23	A	47.4	66.7	19.3	p	H400	40.7173			23	B	94.1	104.8	10.7	p		H250	11.3709	25.9661
24	A	44.7	67.9	23.2	p	H400	51.9016			24	B	49.9	56.8	6.9	p		H250	13.8277	18.4987
25	A	70.1	94.3	24.2	p	H400	34.5221			25	B	33	39.4	6.4	p		H250	19.3939
26	A	46.2	64	17.8	p	H400	38.5281			26	B	43.3	55.1	11.8	p		H250	27.2517
27	A	26	36	10	p	H400	38.4615			27	B	82.5	97.6	15.1	p		H250	18.303
28	A	44.6	59.1	14.5	p	H400	32.5112			28	B	14.7	16.2	1.5	p		H250	10.2041
29	A	31	48.1	17.1	p	H400	55.1613			29	B	25.5	31	5.5	p		H250	21.5686
30	A	20.9	36.9	16	p	H400	76.555			30	B	92.7	108	15.3	p		H250	16.5049
31	A	25.5	24.4	-1.1	p	H400	-4.31373			31	B	22.2	25.5	3.3	p		H250	14.8649
32	A	69.4	98	28.6	p	H400	41.2104			32	B	37.8	44.8	7	p		H250	18.5185
33	A	63.1	81.4	18.3	p	H400	29.0016			33	B	68.4	80.1	11.7	p		H250	17.1053
34	A	87.2	110.1	22.9	p	H400	26.2615			34	B	43.1	54.3	11.2	p		H250	25.9861
35	A	23.8	42.5	18.7	p	H400	78.5714			35	B	55.9	65.4	9.5	p		H250	16.9946
36	A	28	49.3	21.3	p	H400	76.0714			36	B	52	65.5	13.5	p		H250	25.9615
37	A	24.6	41.2	16.6	p	H400	67.4797			37	B	54.6	61.9	7.3	p		H250	13.37
38	A	73.1	92.4	19.3	p	H400	26.4022			38	B	69.7	72.4	2.7	p		H250	3.87374
39	A	24.2	34.7	10.5	p	H400	43.3884			39	B	51.2	63.1	11.9	p		H250	23.2422
40	A	26.9	40.7	13.8	p	H400	51.3011			40	B	54.2	67.4	13.2	p		H250	24.3542
			2007-10-22			mean	47.3248										mean	22.1367
number	site	initial weight	end weight	growth	species	location	% Change			number	site	initial weight	end weight	growth	species	location	location	% Change
1	C	12.1			m	E-100		note - C1 coral tag present, coral missing - slipped out?		1	D	36.6	77.8	41.2	m		H550	112.568	39.8514
2	C	49.9	66	16.1	m	E-100	32.2645			2	D	16.7			m		H550		71.1579
3	C	85.7	125.8	40.1	m	E-100	46.7911			3	D	31.5			m		H550
4	C	11.7	17.3	5.6	m	E-100	47.8632			4	D	26.6	42.6	16	m		H550	60.1504
5	C	12.5	20.2	7.7	m	E-100	61.6			5	D	13.3	27.2	13.9	m		H550	104.511	note - D5 omit
6	C	77.7	119.9	42.2	m	E-100	54.3115			6	D	10.6	31.6	21	m		H550	198.113	note - D6 omit
7	C	69.9	91.5	21.6	m	E-100	30.9013			7	D	18.4			m		H550
8	C	52.9	82.2	29.3	m	E-100	55.3875			8	D	35.9			m		H550
9	C	29.8	38.9	9.1	m	E-100	30.5369			9	D	87.8			m		H550
10	C	72.1	95.7	23.6	m	E-100	32.7323			10	D	14.6	27.7	13.1	m		H550	89.726
11	C	66	84.5	18.5	m	E-100	28.0303			11	D	56.1	106.4	50.3	m		H550	89.6613
12	C	30.7	45.2	14.5	m	E-100	47.2313			12	D	26.9	50.6	23.7	m		H550	88.1041
13	C	68.9	85.2	16.3	m	E-100	23.6575			13	D	99.5			m		H550
14	C	58.9	84.3	25.4	m	E-100	43.1239			14	D	32.8			m		H550
15	C	83.9	104.5	20.6	m	E-100	24.553			15	D	30.8	53.3	22.5	m		H550	73.0519
16	C	10.3	14.4	4.1	m	E-100	39.8058			16	D	12.9	20.6	7.7	m		H550	59.6899
17	C	51.5	73.6	22.1	m	E-100	42.9126			17	D	6.7	31	24.3	m		H550	362.687	note - D17 omit
18	C	61.7	87.1	25.4	m	E-100	41.1669			18	D	82.2	134.1	51.9	m		H550	63.1387
19	C	51.7	64.8	13.1	m	E-100	25.3385			19	D	27.8	64.6	36.8	m		H550	132.374
20	C	38.8	57.8	19	m	E-100	48.9691			20	D	28.3	32.1	3.8	m		H550	13.4276
21	C	35.7	65.4	29.7	p	E-100	83.1933			21	D	101.9			p		H550
22	C	19.4	17	-2.4	p	E-100	-12.3711	note - C22 - 0.1g plastic incorp.		22	D	59			p		H550		note - D22 not on map
23	C	24.5	43.6	19.1	p	E-100	77.9592			23	D	38.1	53.9	15.8	p		H550	41.4698
24	C	40.8	86.3	45.5	p	E-100	111.52			24	D	62.8	113.7	50.9	p		H550	81.051
25	C	72.1	103.7	31.6	p	E-100	43.828			25	D	28	54.4	26.4	p		H550	94.2857
26	C	45.2	59.7	14.5	p	E-100	32.0796			26	D	23.5			p		H550
27	C	75.7	103.4	27.7	p	E-100	36.5918			27	D	103	168.9	65.9	p		H550	63.9806
28	C	32.7	38.7	6	p	E-100	18.3486			28	D	29.1	70.3	41.2	p		H550	141.581
29	C	77.8	101.3	23.5	p	E-100	30.2057			29	D	28.9	46.7	17.8	p		H550	61.5917
30	C	83.5	127	43.5	p	E-100	52.0958	inc 2in weighs 0.3g		30	D	49.4			p		H550
31	C	22.1	33.6	11.5	p	E-100	52.0362	note - C31 incorp. 2" of cable with clasp weighed 0.5g		31	D	15	25.8	10.8	p		H550	72
32	C	20.7	39.1	18.4	p	E-100	88.8889	note - C32 incorp 2.5in of cable - 0.4g weight subtracted from 39.1		32	D	39			p		H550
33	C	57.5	89.6	32.1	p	E-100	55.8261			33	D	86.6			p		H550		note - D33 not on map
34	C	86.3	115.8	29.5	p	E-100	34.1831	note - C34 might be an un-numbered piece at 116.4 with 0.4g plastic. A 5.0g piece was near by		34	D	44.2			p		H550
35	C	68.1	94.8	26.7	p	E-100	39.207	note - C35 had 2in of cable incorporated into it's body - 2in of cable weights 0.4g - this has been removed from 95.0 endweight.		35	D	72.9	123.8	50.9	p		H550	69.8217
36	C	22.2	120.2	98	p	E-100	441.441			36	D	30.1	67.2	37.1	p		H550	123.256
37	C	41.8	32.4	-9.4	p	E-100	-22.488	note - C37 might be an un-numbered piece at 32.4g		37	D	51.2	82.4	31.2	p		H550	60.9375
38	C	51.7	108.4	56.7	p	E-100	109.671			38	D	28.9			p		H550
39	C	30.3	57.5	27.2	p	E-100	89.769	note - C39 incorporated 2.5" of cable tie - weighed 0.4g		39	D	74.6			p		H550
40	C	35.8	57.7	21.9	p	E-100	61.1732			40	D	31.4			p		H550		note - D40 not on map
						mean	49.2709						2007-10-22				mean	79.5933
number	site	initial weight	end weight	growth	species	location	% Change			number	site	initial weight	end weight	growth	species	location	location	% Change
1	E	13.8	21.1	7.3	m	H100	52.8986			1	F	62	82.4	20.4	m		E-250	32.9032
2	E	75.7	104.9	29.2	m	H100	38.5733			2	F	26.7	33.9	7.2	m		E-250	26.9663
3	E	28.5	34.6	6.1	m	H100	21.4035			3	F	91.2			m		E-250
4	E	51.8	64	12.2	m	H100	23.5521			4	F	27.1	38.8	11.7	m		E-250	43.1734
5	E	51.4	66.2	14.8	m	H100	28.7938			5	F	112.4			m		E-250
6	E	16.9	22.5	5.6	m	H100	33.1361			6	F	21.7	31.3	9.6	m		E-250	44.2396
7	E	15.1	20	4.9	m	H100	32.4503			7	F	28.7	36.4	7.7	m		E-250	26.8293
8	E	21.5	28.5	7	m	H100	32.5581			8	F	43.8			m		E-250
9	E	87.1	115.8	28.7	m	H100	32.9506			9	F	30.9	43.4	12.5	m		E-250	40.4531
10	E	35.1			m	H100				10	F	25	46	21	m		E-250	84
11	E	18.6	22.5	3.9	m	H100	20.9677			11	F	50.2	66	15.8	m		E-250	31.4741
12	E	65.9			m	H100		note-E12 on I tray		12	F	8.7	12.9	4.2	m		E-250	48.2759
13	E	46.6	62.1	15.5	m	H100	33.2618			13	F	49.5	68.5	19	m		E-250	38.3838
14	E	26.6	40.8	14.2	m	H100	53.3835			14	F	105.1	142	36.9	m		E-250	35.1094
15	E	65.2	79.9	14.7	m	H100	22.546			15	F	14.7			m		E-250
16	E	21.6	33.8	12.2	m	H100	56.4815			16	F	44.4	56.1	11.7	m		E-250	26.3514
17	E	52.6	63.7	11.1	m	H100	21.1027			17	F	73.6			m		E-250
18	E	13.8	18	4.2	m	H100	30.4348			18	F	24.9	34.1	9.2	m		E-250	36.9478
19	E	43.2	58.9	15.7	m	H100	36.3426			19	F	87.9	112.5	24.6	m		E-250	27.9863
20	E	50.6	65.7	15.1	m	H100	29.8419			20	F	68.5	89.7	21.2	m		E-250	30.9489
21	E	21.8			p	H100				21	F	82.8	120.6	37.8	p		E-250	45.6522
22	E	22.7	28	5.3	p	H100	23.348			22	F	17.8	26.2	8.4	p		E-250	47.191
23	E	96.3	105.2	8.9	p	H100	9.24195			23	F	25.8			p		E-250
24	E	32.6	37.2	4.6	p	H100	14.1104			24	F	76	101	25	p		E-250	32.8947
25	E	29.7	39	9.3	p	H100	31.3131			25	F	47.8	68.4	20.6	p		E-250	43.0962
26	E	71.8	81.2	9.4	p	H100	13.0919			26	F	33.2	47	13.8	p		E-250	41.5663
27	E	92.1	101.7	9.6	p	H100	10.4235			27	F	47.8	59.9	12.1	p		E-250	25.3138
28	E	34.9	49.1	14.2	p	H100	40.6877			28	F	39.9	55.9	16	p		E-250	40.1003
29	E	38.2			p	H100				29	F	30.8	42.6	11.8	p		E-250	38.3117
30	E	14.3	19.8	5.5	p	H100	38.4615			30	F	21			p		E-250
31	E	21.6	24	2.4	p	H100	11.1111			31	F	99.6	114.7	15.1	p		E-250	15.1606
32	E	33.5	42.2	8.7	p	H100	25.9701			32	F	56.4	73.1	16.7	p		E-250	29.6099
33	E	48.9	57.7	8.8	p	H100	17.9959			33	F	28	35.7	7.7	p		E-250	27.5
34	E	68.5	74.8	6.3	p	H100	9.19708			34	F	56.8	68.8	12	p		E-250	21.1268
35	E	60.6	75.2	14.6	p	H100	24.0924			35	F	52.8	69.1	16.3	p		E-250	30.8712
36	E	24	35.7	11.7	p	H100	48.75			36	F	34.5	30.2	-4.3	p		E-250	-12.4638
37	E	77	93.5	16.5	p	H100	21.4286			37	F	58.2	80.1	21.9	p		E-250	37.6289
38	E	72.5	88.5	16	p	H100	22.069			38	F	55.2	78.8	23.6	p		E-250	42.7536
39	E	59.4	73.9	14.5	p	H100	24.4108			39	F	37.4			p		E-250
40	E	48.9	56.5	7.6	p	H100	15.5419			40	F	44	58	14	p		E-250	31.8182
						mean	27.8312										mean	36.2786
number	site	initial weight	end weight	growth	species	location				number	site	initial weight	end weight	growth	species	location	location	% Change
1	G	40.4	63.6	23.2	m	E-550	57.4257			1	H	18.3	32.2	13.9	m			75.9563	47.5712
2	G	13	22.1	9.1	m	E-550	70			2	H	127.2	191.3	64.1	m			50.3931	63.7371
3	G	12.7	21.5	8.8	m	E-550	69.2913			3	H	27.3	31.6	4.3	m			15.7509
4	G	13.5	30.1	16.6	m	E-550	122.963			4	H	40.7	65.7	25	m			61.4251
5	G	35.1	41.1	6	m	E-550	17.094			5	H	25.9	41.7	15.8	m			61.0039
6	G	29.3	50.5	21.2	m	E-550	72.3549			6	H	48.9	40.2	-8.7	m			-17.7914
7	G	34.1	54.3	20.2	m	E-550	59.2375			7	H	70	103.1	33.1	m			47.2857
8	G	39.5	62.8	23.3	m	E-550	58.9873			8	H	33.8	50.6	16.8	m			49.7041
9	G	57.9	81.9	24	m	E-550	41.4508			9	H	69.7	101.8	32.1	m			46.0545
10	G	69.6	88.9	19.3	m	E-550	27.7299			10	H	29.3	41.9	12.6	m			43.0034
11	G	26	49.4	23.4	m	E-550	90			11	H	29.8	59.9	30.1	m			101.007
12	G	27.6	45.1	17.5	m	E-550	63.4058			12	H	32.2	47.4	15.2	m			47.205
13	G	12.3	19.9	7.6	m	E-550	61.7886			13	H	28.4	35.4	7	m			24.6479
14	G	40.6	42.8	2.2	m	E-550	5.41872			14	H	23.1	44	20.9	m			90.4762
15	G	83.4	114.8	31.4	m	E-550	37.6499			15	H	24.2	37.1	12.9	m			53.3058
16	G	27	36.2	9.2	m	E-550	34.0741			16	H	65.9	114.4	48.5	m			73.5964
17	G	34	49.1	15.1	m	E-550	44.4118			17	H	46	71.8	25.8	m			56.087
18	G	115.8	139.5	23.7	m	E-550	20.4663			18	H	18.4	26	7.6	m			41.3043
19	G	28.4	39.8	11.4	m	E-550	40.1408			19	H	17.3	32.9	15.6	m			90.1734
20	G	40.5	44.6	4.1	m	E-550	10.1235			20	H	41.4	62	20.6	m			49.7585
21	G	68.8	101.7	32.9	p	E-550	47.8198			21	H	43.6	70	26.4	p			60.5505
22	G	34.6	55.1	20.5	p	E-550	59.2486			22	H	59	93.8	34.8	p			58.9831
23	G	48.9	100.5	51.6	p	E-550	105.521			23	H	29.6	50.1	20.5	p			69.2568
24	G	76.7	136.6	59.9	p	E-550	78.0965			24	H	37.2	59	21.8	p			58.6022
25	G	54.2	88.4	34.2	p	E-550	63.0996			25	H	97.4	154.9	57.5	p			59.0349
26	G	80.1	128.4	48.3	p	E-550	60.2996			26	H	52	76.5	24.5	p			47.1154
27	G	27.7	48.4	20.7	p	E-550	74.7292			27	H	35.5	65.8	30.3	p			85.3521
28	G	44.5	77.7	33.2	p	E-550	74.6067			28	H	43.5	79.1	35.6	p			81.8391
29	G	45.2	96.2	51	p	E-550	112.832			29	H	58.6	113	54.4	p			92.8328
30	G	95.8	156.8	61	p	E-550	63.6743			30	H	36.8	56.4	19.6	p			53.2609
31	G	39.5	75.5	36	p	E-550	91.1392			31	H	100.5	178	77.5	p			77.1144
32	G	93.4	135.6	42.2	p	E-550	45.182			32	H	40.8	60	19.2	p			47.0588
33	G	90.4	155.1	64.7	p	E-550	71.5708			33	H	50.6	76.6	26	p			51.3834
34	G	28.8	56.7	27.9	p	E-550	96.875			34	H	52.2	76.8	24.6	p			47.1264
35	G	19.8	43.9	24.1	p	E-550	121.717			35	H	61.3	82.7	21.4	p			34.9103
36	G	38	56.1	18.1	p	E-550	47.6316			36	H	27.8	53.5	25.7	p			92.446
37	G	35.5	68.5	33	p	E-550	92.9577			37	H	37.9	47.9	10	p			26.3852
38	G	13.1	19.2	6.1	p	E-550	46.5649			38	H	19.4	28.9	9.5	p			48.9691
39	G	30.7	50.5	19.8	p	E-550	64.4951			39	H	18.8	32	13.2	p			70.2128
40	G	25.3			p	E-550				40	H	13	27.6	14.6	p			112.308
						mean	62.1045										mean	60.3303
number	site	initial weight	end weight	growth	species	location	% Change			number	site	initial weight	end weight	growth	species	location	location	% Change
1	I	23.7	36.7	13	m	E-400	54.8523			1	J	31.2	56.1	24.9	m		H-700	79.8077
2	I	11.2	11.8	0.6	m	E-400	5.35714			2	J	10.5	23.6	13.1	m		H-700	124.762
3	I	28.5	40.6	12.1	m	E-400	42.4561			3	J	38.3	62.3	24	m		H-700	62.6632
4	I	17	24.2	7.2	m	E-400	42.3529			4	J	47.7	54.8	7.1	m		H-700	14.8847
5	I	67.9	86.7	18.8	m	E-400	27.6878			5	J	6.8	10.1	3.3	m		H-700	48.5294
6	I	23.4	34.2	10.8	m	E-400	46.1538			6	J	12.5	26.4	13.9	m		H-700	111.2
7	I	67.9	23.2	-44.7	m	E-400	-65.8321			7	J	21.2	35.1	13.9	m		H-700	65.566
8	I	71.9	99.6	27.7	m	E-400	38.5257			8	J	12.7	25.6	12.9	m		H-700	101.575
9	I	27.6	45.9	18.3	m	E-400	66.3043			9	J	39.7	74.1	34.4	m		H-700	86.6499
10	I	19	24.3	5.3	m	E-400	27.8947			10	J	14.1	25.6	11.5	m		H-700	81.5603
11	I	31.4	33.8	2.4	m	E-400	7.64331			11	J	59.8	69.6	9.8	m		H-700	16.388
12	I	22.4	33.8	11.4	m	E-400	50.8929			12	J	28.3	49.8	21.5	m		H-700	75.9717
13	I	45.5	69.4	23.9	m	E-400	52.5275			13	J	54.2	75.1	20.9	m		H-700	38.5609
14	I	55.3	79.2	23.9	m	E-400	43.2188			14	J	26.6	48.9	22.3	m		H-700	83.8346
15	I	61.8	82.4	20.6	m	E-400	33.3333			15	J	72.8	100.7	27.9	m		H-700	38.3242
16	I	76.8	128.3	51.5	m	E-400	67.0573			16	J	24.2	44.3	20.1	m		H-700	83.0579
17	I	60.1	80.3	20.2	m	E-400	33.6106			17	J	27	35.9	8.9	m		H-700	32.963
18	I	52.6	76	23.4	m	E-400	44.4867			18	J	79.9	119.7	39.8	m		H-700	49.8123
19	I	28.4	34.3	5.9	m	E-400	20.7746			19	J	52.5	69.5	17	m		H-700	32.381
20	I	62.1	103.8	41.7	m	E-400	67.1498			20	J	13.9	33.6	19.7	m		H-700	141.727
21	I	32.2	59.4	27.2	p	E-400	84.472			21	J	55.3	108.5	53.2	p		H-700	96.2025
22	I	86.5	122.7	36.2	p	E-400	41.8497			22	J	13.4	36.6	23.2	p		H-700	173.134
23	I	71.8	110.5	38.7	p	E-400	53.8997			23	J	51.5	125.3	73.8	p		H-700	143.301
24	I	40.4	69.8	29.4	p	E-400	72.7723			24	J	38.6	67.6	29	p		H-700	75.1295
25	I	25.4	42.3	16.9	p	E-400	66.5354			25	J	21.2	33.9	12.7	p		H-700	59.9057
26	I	36.7	60.8	24.1	p	E-400	65.6676			26	J	35.1	57.4	22.3	p		H-700	63.5328
27	I	19	30.8	11.8	p	E-400	62.1053			27	J	52.3	88.3	36	p		H-700	68.8337
28	I	56.8	100.6	43.8	p	E-400	77.1127			28	J	35.9	65.9	30	p		H-700	83.5655
29	I	25.1	37.9	12.8	p	E-400	50.996			29	J	30.7	55.3	24.6	p		H-700	80.1303
30	I	46.7	80.2	33.5	p	E-400	71.7345			30	J	89	116	27	p		H-700	30.3371
31	I	59.5	80.2	20.7	p	E-400	34.7899			31	J	20.9			p		H-700		note J31 on I tray
32	I	12.6	23.9	11.3	p	E-400	89.6825			32	J	72.2	147.1	74.9	p		H-700	103.74
33	I	50.7	64.2	13.5	p	E-400	26.6272			33	J	32.4	61.3	28.9	p		H-700	89.1975
34	I	16.7	30.4	13.7	p	E-400	82.0359			34	J	32.5	81.6	49.1	p		H-700	151.077
35	I	86.7	142.5	55.8	p	E-400	64.3599			35	J	27.1	40.3	13.2	p		H-700	48.7085
36	I	37.3	50.2	12.9	p	E-400	34.5845			36	J	65.2	108	42.8	p		H-700	65.6442
37	I	93.4	132.4	39	p	E-400	41.7559			37	J	17.5	39.6	22.1	p		H-700	126.286
38	I	45	71.3	26.3	p	E-400	58.4444			38	J	25.7	44	18.3	p		H-700	71.2062
39	I	39.2	64.8	25.6	p	E-400	65.3061			39	J	37.3	75.7	38.4	p		H-700	102.949
40	I	27.4	36.9	9.5	p	E-400	34.6715			40	J	43.3	62.1	18.8	p		H-700	43.418
						mean	49.9166										mean	78.1158

## Sheet: Macroalgae
Macroalgae Molokai																						organics				terrigenous
							after drying 100C		after ashing 500C				loi avg	after 1000C							%	Avg %		Avg %		Avg %		Sum
site 1d	crucible id	sample wet wt	sample weight after air dry	crucible wt	crucible + sample	subsample	weight 1	subsample	weight 2	subsample	%LOI	%loss air dry to oven dry		weight 3	subsample	wt loss	CaCO3	%CaCO3	% HCO3	HCO3 avg	Other	LOI	s.d.	CaCO3	s.d.	Other	s.d.		NOTES		check date
c	c1			13.8791	17.7975	3.9184	17.6843	3.8052	16.8223	2.9432	22.6532	2.88893	20.7459	16.3342	2.4551	0.4881	1.11004	29.1716	16.584	17.4091	48.1752	20.7459	2.93764	31.5301	6.77456	47.724	4.50082	100			aef 10/01
	c2			13.314	16.5594	3.2454	16.4609	3.1469	15.7011	2.3871	24.1444	3.03507		15.3409	2.0269	0.3602	0.819167	26.0309	15.0894		49.8247
	c3			12.0866	17.4642	5.3776	17.3156	5.229	16.283	4.1964	19.7476	2.76331		15.6001	3.5135	0.6829	1.55305	29.7007	16.2735		50.5517
	c4			11.6665	15.8263	4.1598	15.7206	4.0541	14.9423	3.2758	19.1978	2.54099		14.3185	2.652	0.6238	1.41865	34.9929	19.0427		45.8093
	c5			12.8431	18.3046	5.4615	18.2075	5.3644	17.4386	4.5955	14.3334	1.7779		16.2625	3.4194	1.1761	2.67469	49.8599	25.5924		35.8067
	c6			11.9852	16.6112	4.626	16.4676	4.4824	15.3891	3.4039	24.0608	3.10419		14.8551	2.8699	0.534	1.21442	27.0931	15.6879		48.8461
	c7			12.7754	19.3427	6.5673	19.1374	6.362	17.8408	5.0654	20.3804	3.12609		17.1513	4.3759	0.6895	1.56806	24.6473	13.612		54.9723
	c8			13.9556	18.6371	4.6815	18.4909	4.5353	17.4285	3.4729	23.4251	3.12293		16.9051	2.9495	0.5234	1.19032	26.2456	15.071		50.3293
	c9			13.9742	17.7217	3.7475	17.6044	3.6302	16.7607	2.7865	23.2411	3.13009		16.296	2.3218	0.4647	1.05682	29.1119	16.6768		47.6469
	c10			13.8953	18.4419	4.5466	18.3173	4.422	17.4445	3.5492	19.7377	2.74051		16.7809	2.8856	0.6636	1.50916	34.1284	18.6972		46.1339
	c11			14.3184	18.8796	4.5612	18.7568	4.4384	17.8526	3.5342	20.3722	2.69227		17.2075	2.8891	0.6451	1.46709	33.0544	18.2531		46.5734
	c12			11.5589	18.0766	6.5177	17.9327	6.3738	16.8073	5.2484	17.6567	2.20783		15.8453	4.2864	0.962	2.18778	34.3246	18.3294		48.0188
total	C	128.78	59.39	156.252	213.663	57.4105	212.096	55.8437	200.711	44.4585	20.7459	2.76084	20.7459	192.897	36.6451	7.8134	17.7692	31.5301	17.4091	17.4091	47.724	20.7459	2.94	31.5301	6.77456	47.724	4.50082	100
f	f1			41.5249	44.902	3.3771	44.902	3.3771	42.6462	1.1213	66.797		61.5281	42.2492	0.7243	0.397	0.902857	26.7347	35.4053	156.544	6.46835	61.5281	5.57422	128.965	375.916	-90.4936	376.685	100			aef 10/01	*for this site and for site H the algae was dried at 110 degrees in bulk so there are no individual post 100 weights
	f2			45.1222	49.8683	4.7461	49.8683	4.7461	46.7875	1.6653	64.9122			20.4271	-24.6951	26.3604	59.9488	1263.12	1582.92		-1228.03											sample spilled
	f3			37.1298	42.1812	5.0514	42.1812	5.0514	39.1595	2.0297	59.8191			38.4337	1.3039	0.7258	1.65061	32.6764	35.759		7.50457
	f4			41.6551	44.8213	3.1662	44.8213	3.1662	42.7568	1.1017	65.2043			42.238	0.5829	0.5188	1.17985	37.2641	47.0909		-2.46842
	f5			37.5239	42.7752	5.2513	42.7752	5.2513	39.7056	2.1817	58.4541			38.9922	1.4683	0.7134	1.62241	30.8955	32.6993		10.6504
	f6			37.4063	43.8052	6.3989	43.8052	6.3989	40.8828	3.4765	45.6703			39.3693	1.963	1.5135	3.442	53.7905	43.5352		0.539129
	f7			43.3354	47.966	4.6306	47.966	4.6306	45.0112	1.6758	63.8103			44.2441	0.9087	0.7671	1.74454	37.6741	45.7752		-1.48445
	f8			43.0777	47.3132	4.2355	47.3132	4.2355	44.6705	1.5928	62.3941			44.1115	1.0338	0.559	1.27128	30.0148	35.0954		7.59113
	f9			37.0043	41.4365	4.4322	41.4365	4.4322	38.6029	1.5986	63.9321			36.1307	-0.8736	2.4722	5.62228	126.851	154.648		-90.7828
	f10			42.1329	47.344	5.2111	47.344	5.2111	44.1937	2.0608	60.4536			38.1384	-3.9945	6.0553	13.771	264.262	293.832		-224.716
	f11			38.6357	42.9323	4.2966	42.9323	4.2966	40.1385	1.5028	65.0235			43.4206	4.7849	-3.2821	-7.46415	-173.722	-218.399		208.699
	f12			35.0829	38.9265	3.8436	38.9265	3.8436	36.5486	1.4657	61.8665			39.6241	4.5412	-3.0755	-6.9943	-181.973	-209.831		220.106
total	F	212.75	58.29	479.631	534.272	54.6406	534.272	54.6406	501.104	21.4727	61.5281	0	61.5281	467.379	-12.2522	33.7249	6.39143	128.965	156.544	156.544	-90.4936	61.5281	5.57422	128.965	375.916	-90.4936	376.685	100
g	g1			11.5589	18.0766	6.5177	17.9327	6.3738	15.7112	4.1523	34.8536	2.20783	22.4028	14.8672	3.3083	0.844	1.91942	30.1143	20.3261	28.8087	35.0321	22.4028	6.84431	51.3105	10.8023	26.2866	5.02494	100			aef 10/01
	g2			12.9311	17.6645	4.7334	17.5644	4.6333	16.7623	3.8312	17.3116	2.11476		15.6704	2.7393	1.0919	2.4832	53.5946	28.5002		29.0938
	g3			12.7168	14.8437	2.1269	14.7716	2.0548	14.2387	1.5219	25.9344	3.38991		13.8315	1.1147	0.4072	0.926054	45.0679	26.756		28.9977
	g4			13.569	15.3267	1.7577	15.2648	1.6958	14.8115	1.2425	26.7307	3.52165		14.46	0.891	0.3515	0.799381	47.1389	28.2897		26.1304
	g5			12.3256	16.2601	3.9345	16.1793	3.8537	15.5521	3.2265	16.2753	2.05363		14.556	2.2304	0.9961	2.26533	58.7833	30.8725		24.9415
	g6			14.5658	16.5355	1.9697	16.4709	1.9051	15.9942	1.4284	25.0223	3.27969		15.5645	0.9987	0.4297	0.977224	51.2951	30.0826		23.6825
	g7			12.548	15.5429	2.9949	15.4842	2.9362	14.9637	2.4157	17.727	1.96		14.1298	1.5818	0.8339	1.89646	64.5888	34.52		17.6842
	g8			12.6422	16.5127	3.8705	16.4437	3.8015	15.8595	3.2173	15.3676	1.78272		14.8582	2.216	1.0013	2.27716	59.9015	31.1224		24.7309
total	G	97.64	26.59	102.857	130.763	27.9053	130.112	27.2542	123.893	21.0358	22.4028	2.53877	23.0708	117.938	15.0802	5.9556	1.69303	51.3105	28.8087	28.8087	26.2866	22.4028	6.84431	51.3105	10.8023	26.2866	5.02494	100			aef 10/01
h	h1			41.5436	47.25	5.7064	47.25	5.7064	45.0917	3.5481	37.8224		32.1703	43.694	2.1504	1.3977	3.17865	55.7032	39.3929	71.0803	6.47432										see notes for site F
	h2			41.274	49.0959	7.8219	49.0959	7.8219	46.6132	5.3392	31.7404			44.8365	3.5625	1.7767	4.04057	51.6572	33.2765		16.6025
	h3			36.0288	42.0922	6.0634	42.0922	6.0634	39.9682	3.9394	35.0299			38.514	2.4852	1.4542	3.30714	54.5427	36.9143		10.4275
	h4			40.0415	46.5937	6.5522	46.5937	6.5522	44.3327	4.2912	34.5075			42.969	2.9275	1.3637	3.10133	47.3326	31.779		18.1599
	h5			41.3275	48.1055	6.778	48.1055	6.778	45.8377	4.5102	33.4582			44.5019	3.1744	1.3358	3.03788	44.8197	29.6173		21.7221
	h6			40.2975	49.698	9.4005	49.698	9.4005	47.1025	6.805	27.6102			46.8579	6.5604	0.2446	0.556269	5.91744	3.59442		66.4723
	h7			36.7167	42.543	5.8263	42.543	5.8263	40.3521	3.6354	37.6036			39.0671	2.3504	1.285	2.92235	50.1579	35.3469		12.2385
	h8			43.5812	50.1805	6.5993	50.1805	6.5993	48.3006	4.7194	28.4864			38.14	-5.4412	10.1606	23.1072	350.147	215.294		-278.633
	h9			34.3369	42.0995	7.7626	42.0995	7.7626	40.1071	5.7702	25.6667			21.2897	-13.0472	18.8174	42.7945	551.291	326.113		-476.958										sample spilled
	h10			32.6524	39.0727	6.4203	39.0727	6.4203	36.8877	4.2353	34.0327			35.4027	2.7503	1.485	3.37719	52.6017	35.0625		13.3656
	h11			38.7769	45.9843	7.2074	45.9843	7.2074	43.4099	4.633	35.7188			42.0128	3.2359	1.3971	3.17728	44.0836	30.1554		20.1975
	h12			42.9791	52.7315	9.7524	52.7315	9.7524	50.3552	7.3761	24.3663			47.6691	4.69	2.6861	6.10873	62.6382	36.4163		12.9955
total	H	407.57	91.17	469.556	555.447	85.8907	555.447	85.8907	528.359	58.8025	32.1703	0	32.1703	484.955	15.3986	43.4039	8.22576	114.241	71.0803	71.0803	-46.4113	32.1703	4.57838	114.241	163.511	-46.4113	161.197	100
i	i1			12.6939	16.0689	3.375	15.9216	3.2277	14.8652	2.1713	32.7292	4.36444	29.0691	14.4243	1.7304	0.4409	1.00269	31.0653	20.3058	21.5679	36.2055	29.0691	4.09721	34.9893	6.85905	35.9417	3.65375	100			aef 10/01
	i2			11.3808	14.9705	3.5897	14.8202	3.4394	13.754	2.3732	30.9996	4.18698		13.2613	1.8805	0.4927	1.1205	32.5783	20.761		36.4221
	i3			14.0752	16.8481	2.7729	16.7432	2.668	15.8698	1.7946	32.7361	3.78304		15.4946	1.4194	0.3752	0.85328	31.982	20.9072		35.2819
	i4			12.8815	16.2587	3.3772	16.1294	3.2479	15.1206	2.2391	31.0601	3.82862		14.6608	1.7793	0.4598	1.04568	32.1955	20.535		36.7444
	i5			11.8737	14.7211	2.8474	14.6307	2.757	13.8453	1.9716	28.4875	3.17483		13.4647	1.591	0.3806	0.865561	31.395	19.3041		40.1175
	i6			12.3115	15.6287	3.3172	15.5107	3.1992	14.5709	2.2594	29.3761	3.55722		14.1413	1.8298	0.4296	0.976996	30.5388	19.0139		40.0851
	i7			13.2332	18.2443	5.0111	18.1354	4.9022	17.2408	4.0076	18.2489	2.17318		16.029	2.7958	1.2118	2.75588	56.2171	30.2375		25.5339
	i8			13.1913	17.2128	4.0215	17.0484	3.8571	15.7696	2.5783	33.1544	4.08803		15.259	2.0677	0.5106	1.16121	30.1057	19.8037		36.7399
	i9			11.8858	15.9542	4.0684	15.8072	3.9214	14.638	2.7522	29.8159	3.61321		14.0037	2.1179	0.6343	1.44253	36.786	23.047		33.3981
	i10			14.0822	18.3656	4.2834	18.2251	4.1429	17.076	2.9938	27.7366	3.2801		16.433	2.3508	0.643	1.46231	35.2968	21.4777		36.9666
	i11			12.7464	17.4103	4.6639	17.2779	4.5315	16.1953	3.4489	23.8905	2.83883		15.4436	2.6972	0.7517	1.70952	37.7252	21.7954		38.3843
	i12			12.0853	15.001	2.9157	14.8958	2.8105	14.0266	1.9413	30.9269	3.60805		13.6251	1.5398	0.4015	0.913091	32.4886	20.682		36.5845
	i13			12.2567	14.2831	2.0264	14.2201	1.9634	13.6559	1.3992	28.7359	3.10896		13.3409	1.0842	0.315	0.716373	36.4864	22.5129		34.7778
total	I	166.25	47.98	164.697	210.967	46.2698	209.366	44.6682	196.628	31.9305	29.0691	3.50811	29.0691	189.581	24.8838	7.0467	1.23274	34.9893	21.5679	21.5679	35.9417	29.0691	4.09721	34.9893	6.85905	35.9417	3.65375	100
H100	h1a			12.24	14.3213	2.0813	14.1308	1.8908	13.2838	1.0438	44.7959	9.15293		13.1152	0.8752	0.1686	0.38343	20.2787	16.1525	16.0808	34.9254	40.0947	4.47233	21.7506	23.5739	38.1546	24.109	100			aef 10/10
	h1b			14.0669	15.7923	1.7254	15.6206	1.5537	14.941	0.8741	43.7407	9.95132		14.7937	0.7268	0.1473	0.33499	21.5608	16.8516		34.6985
	h2a			13.3286	15.4421	2.1135	15.269	1.9404	14.4001	1.0715	44.7794	8.19021		14.2426	0.914	0.1575	0.358187	18.4594	14.699		36.7612
	h2b			12.2944	14.4374	2.143	14.2599	1.9655	13.4326	1.1382	42.0911	8.28278		13.2615	0.9671	0.1711	0.389116	19.7973	15.0325		38.1116
	h3a			13.3858	15.4011	2.0153	15.2336	1.8478	14.3987	1.0129	45.1835	8.31142		14.2468	0.861	0.1519	0.345451	18.6953	14.9965		36.1213
	h3b			13.8782	15.7845	1.9063	15.6197	1.7415	14.8778	0.9996	42.6012	8.64502		14.7359	0.8577	0.1419	0.322709	18.5305	14.1957		38.8683
	h3c			12.234	13.545	1.311	13.4461	1.2121	12.9651	0.7311	39.6832	7.54386		12.8612	0.6272	0.1039	0.236289	19.4942	14.2115		40.8226
	o1			11.932	13.0911	1.1591	13.0471	1.1151	12.5592	0.6272	43.7539	3.79605		12.4628	0.5308	0.0964	0.219233	19.6604	15.3699		36.5857
	o2			11.9186	13.1792	1.2606	13.1262	1.2076	12.5795	0.6609	45.2716	4.20435		12.4751	0.5565	0.1044	0.237426	19.661	15.7966		35.0674
	o3			12.8319	14.1966	1.3647	14.1368	1.3049	13.5508	0.7189	44.9077	4.38192		13.443	0.6111	0.1078	0.245159	18.7876	14.9951		36.3048
	o4			11.3238	12.7034	1.3796	12.656	1.3322	12.133	0.8092	39.2584	3.43578		12.0301	0.7063	0.1029	0.234015	17.5661	12.7163		43.1756
	o5			14.9276	16.2109	1.2833	16.1659	1.2383	15.6724	0.7448	39.853	3.50658		15.5641	0.6365	0.1083	0.246296	19.8898	14.5408		40.2571
	o6			12.6935	14.4248	1.7313	14.3583	1.6648	13.7928	1.0993	33.968	3.84104		13.6478	0.9543	0.145	0.329759	19.8077	13.1902		46.2242
	o7			12.125	13.2417	1.1167	13.1957	1.0707	12.7441	0.6191	42.178	4.11928		12.6154	0.4904	0.1287	0.29269	27.3363	20.7882		30.4857
	o8			11.663	13.0296	1.3666	12.9735	1.3105	12.42	0.757	42.2358	4.10508		12.301	0.638	0.119	0.27063	20.6509	15.7199		37.1133
	o9			12.8812	14.2751	1.3939	14.2163	1.3351	13.6475	0.7663	42.6036	4.21838		13.5356	0.6544	0.1119	0.254483	19.061	14.6026		38.3355
	o10			14.065	15.2747	1.2097	15.2268	1.1618	14.7423	0.6773	41.7025	3.95966		14.6424	0.5774	0.0999	0.227193	19.5552	14.7497		38.7422
	o11			11.4404	12.8161	1.3757	12.7682	1.3278	12.2631	0.8227	38.0404	3.48186		12.1626	0.7222	0.1005	0.228557	17.2132	12.2159		44.7464
	o12			12.2985	14.453	2.1545	14.3784	2.0799	13.641	1.3425	35.4536	3.46252		13.4202	1.1217	0.2208	0.502143	24.1427	16.4469		40.4037
	o13			13.4733	14.9618	1.4885	14.8934	1.4201	14.2936	0.8203	42.2365	4.59523		14.1698	0.6965	0.1238	0.281546	19.8258	15.092		37.9378
	o14			14.7125	16.3545	1.642	16.2775	1.565	15.6054	0.8929	42.9457	4.6894		15.4785	0.766	0.1269	0.288596	18.4406	14.2121		38.6137
	o15			12.5765	14.2696	1.6931	14.1956	1.6191	13.5197	0.9432	41.7454	4.37068		13.3899	0.8134	0.1298	0.295191	18.2318	13.7617		40.0228
	o16			12.1847	13.4251	1.2404	13.3694	1.1847	12.8403	0.6556	44.6611	4.49049		12.7398	0.5551	0.1005	0.228557	19.2924	15.3295		36.0465
	o17			12.401	14.4404	2.0394	14.3489	1.9479	13.543	1.142	41.3728	4.48661		13.3919	0.9909	0.1511	0.343632	17.6411	13.2312		40.9861
	o18			12.3874	13.963	1.5756	13.8984	1.511	13.248	0.8606	43.0443	4.10003		13.1273	0.7399	0.1207	0.274496	18.1665	14.0251		38.7892
	o19			12.2284	13.9769	1.7485	13.8978	1.6694	13.1904	0.962	42.3745	4.52388		13.0401	0.8117	0.1503	0.341812	20.4752	15.6237		37.1503
	o20			13.9537	15.6604	1.7067	15.5913	1.6376	14.939	0.9853	39.8327	4.04875		14.8109	0.8572	0.1281	0.291325	17.7898	13.0011		42.3776
	o21			12.7966	15.354	2.5574	15.288	2.4914	14.6419	1.8453	25.9332	2.58075		14.857	2.0604	-0.2151	-0.48918	-19.6348	-11.6566		93.7016
	o22			13.8853	15.6768	1.7915	15.5944	1.7091	14.9044	1.0191	40.3721	4.5995		15.6132	1.7279	-0.7088	-1.61195	-94.3159	-69.5516		153.944
	o23			11.9002	14.0048	2.1046	13.9053	2.0051	13.0725	1.1723	41.5341	4.72774		12.8912	0.991	0.1813	0.412312	20.5632	15.4653		37.9027
	o24			14.8103	16.5046	1.6943	16.4281	1.6178	15.7534	0.9431	41.7048	4.51514		14.7417	-0.0686	1.0117	2.30081	142.218	107.274		-83.9231
	o25			14.1072	15.6823	1.5751	15.6135	1.5063	14.9714	0.8642	42.6276	4.36798		14.2663	0.1591	0.7051	1.60354	106.455	81.5899		-49.0831
	o26			14.6189	16.6103	1.9914	16.5196	1.9007	15.6743	1.0554	44.4731	4.55458		15.5047	0.8858	0.1696	0.385704	20.2928	16.0697		35.2342
	o27			12.4678	14.519	2.0512	14.4226	1.9548	13.559	1.0912	44.1784	4.69969		13.3882	0.9204	0.1708	0.388433	19.8707	15.6525		35.9508
	o28			12.2797	14.1758	1.8961	14.0981	1.8184	13.3827	1.103	39.3423	4.09789		13.197	0.9173	0.1857	0.422319	23.2248	16.8359		37.433
	o29			12.2952	14.1138	1.8186	14.0421	1.7469	13.3746	1.0794	38.2105	3.94259		13.2296	0.9344	0.145	0.329759	18.8768	13.4334		42.9126
	o31			12.2197	14.3803	2.1606	14.2812	2.0615	13.4763	1.2566	39.0444	4.58669		13.3094	1.0897	0.1669	0.379564	18.412	13.2819		42.5436
	o32			11.7143	13.5841	1.8698	13.5078	1.7935	12.7375	1.0232	42.9495	4.08065		12.6035	0.8892	0.134	0.304743	16.9915	13.0962		40.0589
	o33			12.0926	14.074	1.9814	13.9909	1.8983	13.2456	1.153	39.2614	4.194		13.0868	0.9942	0.1588	0.361143	19.0245	13.7728		41.714
	o34			14.3649	16.6962	2.3313	16.6093	2.2444	15.7109	1.346	40.0285	3.72753		15.5065	1.1416	0.2044	0.464846	20.7114	15.1857		39.2601
	o35			13.5272	15.0588	1.5316	15.002	1.4748	14.4218	0.8946	39.3409	3.70854		14.3138	0.7866	0.108	0.245614	16.654	12.0724		44.005
	o36			12.6859	15.038	2.3521	14.9274	2.2415	13.9747	1.2888	42.5028	4.70218		13.7883	1.1024	0.1864	0.423911	18.9119	14.4631		38.5853
	o37			11.4779	13.1845	1.7066	13.1009	1.623	12.4176	0.9397	42.101	4.89863		12.288	0.8101	0.1296	0.294736	18.16	13.7916		39.739
	o38			13.2245	15.2698	2.0453	15.1707	1.9462	14.325	1.1005	43.4539	4.84525		14.1742	0.9497	0.1508	0.342949	17.6215	13.7029		38.9246
	o39			11.616	13.9694	2.3534	13.8453	2.2293	12.924	1.308	41.3269	5.27322		12.7188	1.1028	0.2052	0.466666	20.9333	15.6881		37.7398
	o40			11.4044	13.4447	2.0403	13.325	1.9206	12.5386	1.1342	40.9455	5.86678		12.3537	0.9493	0.1849	0.4205	21.8942	16.3022		37.1603
	o41			11.5747	13.4387	1.864	13.3431	1.7684	12.647	1.0723	39.3633	5.12876		12.4628	0.8881	0.1842	0.418908	23.6885	17.178		36.9482
	o42			12.0777	13.8505	1.7728	13.7722	1.6945	13.1509	1.0732	36.6657	4.41674		12.9632	0.8855	0.1877	0.426867	25.1913	17.4898		38.143
	o43			14.2795	16.0468	1.7673	15.968	1.6885	15.2742	0.9947	41.0897	4.45878		15.0998	0.8203	0.1744	0.39662	23.4895	17.5329		35.4208
	o44			12.8569	14.785	1.9281	14.7024	1.8455	13.953	1.0961	40.6069	4.28401		13.7695	0.9126	0.1835	0.417316	22.6126	16.7412		36.7805
	o45			14.3505	16.6526	2.3021	16.5467	2.1962	15.726	1.3755	37.3691	4.60015		15.4856	1.1351	0.2404	0.546718	24.8938	17.4773		37.7371
	o46			12.8556	15.1501	2.2945	15.0562	2.2006	14.3651	1.5095	31.4051	4.09239		14.1142	1.2586	0.2509	0.570597	25.9291	16.6214		42.6658
	o47			11.84	13.8225	1.9825	13.727	1.887	13.0677	1.2277	34.9391	4.81715		12.8832	1.0432	0.1845	0.41959	22.2358	15.0281		42.8251
	o48			11.669	13.6367	1.9677	13.5498	1.8808	12.7944	1.1254	40.1638	4.41632		12.6304	0.9614	0.164	0.372969	19.8303	14.5726		40.0059
	o49			12.8695	14.5875	1.718	14.5048	1.6353	13.8238	0.9543	41.6437	4.81374		13.6746	0.8051	0.1492	0.339311	20.7491	15.6345		37.6071
	o50			12.0395	13.8423	1.8028	13.7604	1.7209	13.1111	1.0716	37.7303	4.54293		12.9431	0.9036	0.168	0.382066	22.2015	15.6775		40.0682
	o51			11.6714	13.6127	1.9413	13.506	1.8346	12.7438	1.0724	41.5458	5.49632		12.5664	0.895	0.1774	0.403443	21.9908	16.5423		36.4634
	o52			12.2499	13.9143	1.6644	13.8193	1.5694	13.1656	0.9157	41.6529	5.70776		13.0292	0.7793	0.1364	0.310201	19.7656	14.8957		38.5816
	o53			10.6877	12.5995	1.9118	12.5017	1.814	11.8638	1.1761	35.1654	5.1156		11.648	0.9603	0.2158	0.490772	27.0547	18.3488		37.7799
	o54			13.2188	14.899	1.6802	14.8149	1.5961	14.2166	0.9978	37.4851	5.00536		14.0516	0.8328	0.165	0.375243	23.51	16.5364		39.0049
	o55			12.689	14.2162	1.5272	14.1326	1.4436	13.5159	0.8269	42.7196	5.47407		13.3866	0.6976	0.1293	0.294054	20.3695	15.6367		36.9109
	o56			12.3663	14.4834	2.1171	14.3546	1.9883	13.4812	1.1149	43.927	6.08379		13.289	0.9227	0.1922	0.437101	21.9837	17.2392		34.0894
	o57			12.479	14.0767	1.5977	14.0065	1.5275	13.4492	0.9702	36.4845	4.39382		13.3043	0.8253	0.1449	0.329532	21.5733	14.9351		41.9423
	o58			13.5827	15.3993	1.8166	15.313	1.7303	14.6552	1.0725	38.0165	4.75063		14.4958	0.9131	0.1594	0.362507	20.9506	14.8625		41.0329
	o59			12.6999	14.8606	2.1607	14.751	2.0511	13.9819	1.282	37.497	5.07243		13.7599	1.06	0.222	0.504872	24.6147	17.3167		37.8883
	o60			13.2341	14.5136	1.2795	14.4486	1.2145	13.9693	0.7352	39.4648	5.08011		13.8551	0.621	0.1142	0.259714	21.3844	15.5332		39.1508
	o61			12.6021	13.8618	1.2597	13.8025	1.2004	13.3294	0.7273	39.4119	4.70747		13.2074	0.6053	0.122	0.277452	23.1133	16.7744		37.4748
	o62			12.0917	15.0768	2.9851	15.0164	2.9247	14.5319	2.4402	16.5658	2.02338		13.9779	1.8862	0.554	1.25991	43.0782	22.7031		40.356
	o63			11.534	13.9652	2.4312	13.7865	2.2525	12.9761	1.4421	35.9778	7.35028		12.7413	1.2073	0.2348	0.533982	23.7062	16.2818		40.316
total	H100	596.01	150.44	876.454	1001.3	124.851	995.158	118.704	948.123	71.6695	40.0947	4.89415	40.0947	936.876	60.422	11.2475	0.370711	21.7506	16.0808	16.0808	38.1546	40.0947	4.47233	21.7506	23.5739	38.1546	24.109	100
H250	s1a			11.6674	13.6763	2.0089	13.4635	1.7961	12.4698	0.8024	55.3254	10.5929		12.2926	0.6252	0.1772	0.402988	22.4368	22.0837		22.2377										aef 10/10
	s1b			11.3129	13.2695	1.9566	13.0786	1.7657	12.066	0.7531	57.3484	9.75672		11.906	0.5931	0.16	0.363872	20.6078	21.2455		22.0438
	s1c			13.6962	15.1537	1.4575	14.9991	1.3029	14.265	0.5688	56.3435	10.6072		14.1345	0.4383	0.1305	0.296783	22.7787	22.943		20.8778
	s1d			11.502	13.8706	2.3686	13.6217	2.1197	12.4324	0.9304	56.107	10.5083		12.2301	0.7281	0.2023	0.460071	21.7045	21.7433		22.1885
	s1e			12.9557	14.5782	1.6225	14.4056	1.4499	13.5853	0.6296	56.5763	10.6379		13.4461	0.4904	0.1392	0.316569	21.8338	22.1093		21.5899
	s1f			11.4948	13.2133	1.7185	13.0295	1.5347	12.1594	0.6646	56.6951	10.6954		12.0099	0.5151	0.1495	0.339993	22.1537	22.4947		21.1512
	s1g			12.123	13.7159	1.5929	13.5651	1.4421	12.7604	0.6374	55.8006	9.46701		12.6085	0.4855	0.1519	0.345451	23.9547	23.8312		20.2447
	s1h			15.2329	16.9577	1.7248	16.7785	1.5456	15.9087	0.6758	56.2759	10.3896		15.7653	0.5324	0.1434	0.32612	21.0999	21.2193		22.6242
	s1i			12.2203	13.766	1.5457	13.6044	1.3841	12.8286	0.6083	56.0509	10.4548		12.7002	0.4799	0.1284	0.292007	21.0973	21.108		22.8519
	s1j			12.6158	14.3874	1.7716	14.21	1.5942	13.2873	0.6715	57.8786	10.0135		13.1502	0.5344	0.1371	0.311793	19.5579	20.417		22.5635
	s1k			13.7693	15.2249	1.4556	15.0745	1.3052	14.3491	0.5798	55.5777	10.3325		14.2121	0.4428	0.137	0.311565	23.8711	23.6288		20.5512
	s1l			12.8547	14.3027	1.448	14.1601	1.3054	13.4204	0.5657	56.6646	9.84807		13.2917	0.437	0.1287	0.29269	22.4214	22.7506		20.9139
	s1m			14.2468	15.67	1.4232	15.5279	1.2811	14.8236	0.5768	54.9762	9.98454		14.701	0.4542	0.1226	0.278817	21.7639	21.2552		23.2599
	s1n			11.5829	12.5567	0.9738	12.4621	0.8792	11.9659	0.383	56.4377	9.71452		11.8737	0.2908	0.0922	0.209681	23.8491	24.0731		19.7132
	s1o			10.8184	12.8711	2.0527	12.6921	1.8737	11.7604	0.942	49.7251	8.72022		11.5057	0.6873	0.2547	0.579239	30.9142	27.0382		19.3607
	s2a			12.0382	13.4865	1.4483	13.3292	1.291	12.6148	0.5766	55.3369	10.861		12.4709	0.4327	0.1439	0.327257	25.3491	24.9566		19.3139
	s2b			11.5435	13.0785	1.535	12.9163	1.3728	12.1506	0.6071	55.7765	10.5668		12.0145	0.471	0.1361	0.309519	22.5465	22.4181		21.677
	s2c			11.8252	13.239	1.4138	13.0871	1.2619	12.4111	0.5859	53.57	10.7441		12.2684	0.4432	0.1427	0.324528	25.7174	24.3557		20.7125
	s2d			14.1207	15.4258	1.3051	15.2979	1.1772	14.6312	0.5105	56.6344	9.80002		14.5182	0.3975	0.113	0.256985	21.8302	22.1352		21.5355
	s2e			11.7079	13.2876	1.5797	13.1412	1.4333	12.3515	0.6436	55.0966	9.26758		12.2013	0.4934	0.1502	0.341585	23.8321	23.3375		21.0713
	s2f1			13.3115	14.6671	1.3556	14.5426	1.2311	13.8668	0.5553	54.894	9.18413		13.7328	0.4213	0.134	0.304743	24.7537	24.1311		20.3523
	s2g1			13.8789	15.1144	1.2355	15.0042	1.1253	14.4051	0.5262	53.2391	8.91947		14.2761	0.3972	0.129	0.293372	26.0705	24.5154		20.6903
	s2h			12.1089	13.833	1.7241	13.6905	1.5816	12.9274	0.8185	48.2486	8.26518		12.7092	0.6003	0.2182	0.49623	31.3752	26.6585		20.3762
	s2i			11.6658	13.1857	1.5199	13.0611	1.3953	12.3351	0.6693	52.0318	8.19791		12.164	0.4982	0.1711	0.389116	27.8876	25.564		20.0806
	s2j			12.8599	14.4493	1.5894	14.3151	1.4552	13.5583	0.6984	52.0066	8.44344		13.3722	0.5123	0.1861	0.423229	29.0839	26.6466		18.9095
	s2k			11.9942	13.8436	1.8494	13.6817	1.6875	13.0572	1.063	37.0074	8.75419		12.7441	0.7499	0.3131	0.712052	42.1957	29.4544		20.7969
	s2l			12.7975	14.4978	1.7003	14.3382	1.5407	13.4747	0.6772	56.046	9.38658		13.2845	0.487	0.1902	0.432553	28.0751	28.0862		15.879
	s2m			13.9606	15.3201	1.3595	15.1919	1.2313	14.5121	0.5515	55.2099	9.42994		14.3678	0.4072	0.1443	0.328167	26.6521	26.165		18.138
	s2n			13.9516	15.4317	1.4801	15.2955	1.3439	14.527	0.5754	57.1843	9.20208		14.3746	0.423	0.1524	0.346588	25.7897	26.4859		17.026
	s2o			13.916	15.2278	1.3118	15.123	1.207	14.4539	0.5379	55.435	7.98902		14.3067	0.3907	0.1472	0.334762	27.7351	27.3657		16.83
	s2p			11.5682	12.9475	1.3793	12.8343	1.2661	12.1179	0.5497	56.5832	8.20706		11.9834	0.4152	0.1345	0.30588	24.1592	24.4679		19.2576
	s2q			14.3394	15.3839	1.0445	15.3001	0.9607	14.7729	0.4335	54.8767	8.02298		14.6612	0.3218	0.1117	0.254028	26.442	25.767		18.6814
	s2r			11.8907	13.0977	1.207	13.0127	1.122	12.3854	0.4947	55.9091	7.04225		12.2672	0.3765	0.1182	0.26881	23.9581	23.8933		20.1328
	s2s			14.1041	15.4693	1.3652	15.3649	1.2608	14.6259	0.5218	58.6136	7.64723		14.49	0.3859	0.1359	0.309064	24.5133	26.0445		16.8731
	s2t			12.7657	14.3353	1.5696	14.2264	1.4607	13.4026	0.6369	56.3976	6.93807		13.2381	0.4724	0.1645	0.374106	25.6114	25.8282		17.991
	s2u			12.0878	13.4067	1.3189	13.3157	1.2279	12.5826	0.4948	59.7036	6.89969		12.4612	0.3734	0.1214	0.276088	22.4846	24.5352		17.8119
	s2v			12.2744	13.6532	1.3788	13.5405	1.2661	12.8166	0.5422	57.1756	8.17377		12.6868	0.4124	0.1298	0.295191	23.315	23.9395		19.5094
	s2w			12.8407	14.3619	1.5212	14.235	1.3943	13.3971	0.5564	60.0947	8.3421		13.2515	0.4108	0.1456	0.331124	23.7484	26.1682		16.157
	s2x			12.7301	13.9543	1.2242	13.833	1.1029	13.2105	0.4804	56.4421	9.90851		13.1031	0.373	0.1074	0.244249	22.1461	22.3564		21.4118
	s2y			13.5805	15.0337	1.4532	14.9311	1.3506	14.2716	0.6911	48.8301	7.06028		14.0509	0.4704	0.2207	0.501916	37.1624	31.9346		14.0074
	s3a			12.8656	14.1449	1.2793	14.095	1.2294	13.41	0.5444	55.7182	3.90057		13.2748	0.4092	0.1352	0.307472	25.0099	24.8347		19.2719
	s3b			13.4553	14.7554	1.3001	14.6965	1.2412	13.9848	0.5295	57.3397	4.53042		13.8603	0.405	0.1245	0.283138	22.8116	23.5127		19.8487
	s3c			12.8183	14.144	1.3257	14.0768	1.2585	13.3628	0.5445	56.7342	5.06902		13.2266	0.4083	0.1362	0.309746	24.6123	25.0138		18.6535
	s3d			12.7426	14.1978	1.4552	14.1233	1.3807	13.3483	0.6057	56.1309	5.11957		13.1998	0.4572	0.1485	0.337719	24.46	24.5171		19.4091
	s3e			11.2863	13.0175	1.7312	12.931	1.6447	12.0401	0.7538	54.1679	4.99653		11.8271	0.5408	0.213	0.484405	29.4525	28.2568		16.3796
	s3f			12.1856	13.5896	1.404	13.5206	1.335	12.7915	0.6059	54.6142	4.91453		12.6354	0.4498	0.1561	0.355003	26.592	25.7633		18.7938
	s3g			12.6724	14.4557	1.7833	14.3492	1.6768	13.4385	0.7661	54.3118	5.97207		13.2536	0.5812	0.1849	0.4205	25.0775	24.1352		20.6107
	s3h			11.9361	13.1368	1.2007	13.075	1.1389	12.4325	0.4964	56.4141	5.147		12.3058	0.3697	0.1267	0.288141	25.3	25.5238		18.286
	s3i			11.414	12.9194	1.5054	12.8425	1.4285	12.063	0.649	54.5677	5.10828		11.9003	0.4863	0.1627	0.370012	25.9022	25.0693		19.5301
	s3j			11.8899	13.3305	1.4406	13.2496	1.3597	12.4593	0.5694	58.1231	5.61572		12.3168	0.4269	0.1425	0.324074	23.8342	25.0263		18.0427
	s3k			12.8665	14.7055	1.839	14.6031	1.7366	13.6242	0.7577	56.3688	5.56824		13.4203	0.5538	0.2039	0.463709	26.7021	26.9104		16.9291
	s3l			11.5954	13.3076	1.7122	13.2079	1.6125	12.2791	0.6837	57.6	5.82292		12.1144	0.519	0.1647	0.374561	23.2286	24.0895		19.1714
	s3m			13.0638	14.6798	1.616	14.579	1.5152	13.732	0.6682	55.9002	6.23762		13.572	0.5082	0.16	0.363872	24.0148	23.9449		20.085
	s3n			12.3277	13.7572	1.4295	13.6757	1.348	12.9132	0.5855	56.5653	5.70129		12.775	0.4473	0.1382	0.314294	23.3156	23.6038		20.1191
	s3o			14.4422	15.5649	1.1227	15.5156	1.0734	15.0149	0.5727	46.6462	4.3912		14.8156	0.3734	0.1993	0.453248	42.2255	34.8001		11.1284
	s4a			11.8194	13.5854	1.766	13.4929	1.6735	12.6112	0.7918	52.686	5.23783		12.4192	0.5998	0.192	0.436646	26.0918	24.2485		21.2222
	s4b			12.4661	14.1813	1.7152	14.0876	1.6215	13.2113	0.7452	54.0426	5.46292		13.0167	0.5506	0.1946	0.442559	27.2932	26.1138		18.6642
	s4c			12.0841	13.7001	1.616	13.622	1.5379	12.8573	0.7732	49.7236	4.83292		12.6602	0.5761	0.1971	0.448245	29.1466	25.4915		21.1298
	s4d			12.107	13.9075	1.8005	13.7976	1.6906	12.9461	0.8391	50.3667	6.10386		12.7175	0.6105	0.2286	0.519882	30.7513	27.2435		18.8819
	s4e			11.5773	13.1628	1.5855	13.0773	1.5	12.3034	0.7261	51.5933	5.39262		12.0926	0.5153	0.2108	0.479401	31.9601	29.0318		16.4466
	s4f			12.8333	14.4577	1.6244	14.381	1.5477	13.568	0.7347	52.5296	4.72174		13.3524	0.5191	0.2156	0.490318	31.6804	29.3453		15.79
	s2f2			12.4671	14.1724	1.7053	14.0018	1.5347	13.2228	0.7557	50.7591	10.0041		12.9962	0.5291	0.2266	0.515334	33.5788	29.9854		15.6621
	s2g2			14.71	15.9686	1.2586	15.8502	1.1402	15.1975	0.4875	57.2443	9.40728		15.0641	0.3541	0.1334	0.303378	26.6075	27.3641		16.1482
	s2h2			11.6127	13.0061	1.3934	12.8659	1.2532	12.1673	0.5546	55.7453	10.0617		12.022	0.4093	0.1453	0.330441	26.3678	26.1991		17.8869
	s2i2			12.5721	13.9668	1.3947	13.8322	1.2601	13.1495	0.5774	54.1782	9.65082		12.9887	0.4166	0.1608	0.365691	29.0208	27.849		16.8009
	s2j2			12.0848	13.5154	1.4306	13.3773	1.2925	12.6676	0.5828	54.9091	9.65329		12.515	0.4302	0.1526	0.347043	26.8505	26.1839		18.2404
	s2k2			13.5278	15.1002	1.5724	14.949	1.4212	14.1316	0.6038	57.5148	9.61587		13.9782	0.4504	0.1534	0.348862	24.547	25.4058		17.9382
	s2l2			12.4537	14.0404	1.5867	13.878	1.4243	13.0854	0.6317	55.6484	10.2351		12.9139	0.4602	0.1715	0.390025	27.3836	27.149		16.968
	s2m2			12.3714	14.2817	1.9103	14.0934	1.722	13.1533	0.7819	54.5935	9.85709		12.953	0.5816	0.2003	0.455522	26.4531	25.6171		18.9534
	s2n2			11.5291	13.2159	1.6868	13.0608	1.5317	12.2743	0.7452	51.3482	9.19493		12.0675	0.5384	0.2068	0.470305	30.7047	27.7509		17.9471
	s2o2			12.2313	13.8493	1.618	13.6955	1.4642	12.926	0.6947	52.5543	9.50556		12.7388	0.5075	0.1872	0.42573	29.076	26.9469		18.3697
	s2p2			12.6908	14.286	1.5952	14.1249	1.4341	13.3394	0.6486	54.773	10.099		13.171	0.4802	0.1684	0.382975	26.7049	25.9636		18.5221
	s2q2			11.6623	13.2689	1.6066	13.1667	1.5044	12.4961	0.8338	44.5759	6.36126		12.1963	0.534	0.2998	0.681805	45.3207	35.9559		10.1034
total	H250	578.96	150.44	918.317	1030.32	112.001	1021.18	102.86	965.144	46.8274	54.6043	8.11602	54.6043	953.187	34.8703	11.9571	0.372505	0.163796	0.372505	26.3638	25.3972	54.6043	3.53159	26.3638	4.81448	19.0319	2.44311	100
H400	5-1a			12.223	13.5468	1.3238	13.4168	1.1938	12.778	0.555	53.5098	9.82021	49.5129	12.6278	0.4048	0.1502	0.341585	28.6132	27.0631	29.3105	17.877	49.5129	6.00433	33.6485	5.38965	16.8386	3.343	100			aef 10/10
	5-1b			12.1248	13.8456	1.7208	13.6843	1.5595	12.8997	0.7749	50.311	9.37355		12.6624	0.5376	0.2373	0.539668	34.6052	30.6233		15.0838
	5-2a			11.4847	12.7817	1.297	12.6404	1.1557	11.9868	0.5021	56.5545	10.8944		11.8401	0.3554	0.1467	0.333625	28.8678	29.2173		14.5777
	5-2b			14.3341	15.715	1.3809	15.5772	1.2431	14.9025	0.5684	54.2756	9.979		14.7392	0.4051	0.1633	0.371377	29.8751	28.7298		15.8493
	5-3a			14.0475	15.1542	1.1067	15.0487	1.0012	14.522	0.4745	52.6069	9.53285		14.3906	0.3431	0.1314	0.29883	29.8472	27.6923		17.546
	5-3b			12.047	13.0697	1.0227	12.9651	0.9181	12.4815	0.4345	52.674	10.2278		12.3538	0.3068	0.1277	0.290415	31.6322	29.3901		15.6938
	5-3c			12.99	13.9493	0.9593	13.8624	0.8724	13.4238	0.4338	50.2751	9.05869		13.283	0.293	0.1408	0.320207	36.7042	32.4574		13.0207
	ha			11.5986	12.9266	1.328	12.7866	1.188	12.1273	0.5287	55.4966	10.5422		11.9882	0.3896	0.1391	0.316341	26.628	26.3098		17.8753
	hb			13.0728	14.7665	1.6937	14.6086	1.5358	13.8021	0.7293	52.5133	9.32278		13.6076	0.5348	0.1945	0.442332	28.8014	26.6694		18.6853
	hc			12.8701	14.4114	1.5413	14.2716	1.4015	13.5437	0.6736	51.9372	9.07027		13.3537	0.4836	0.19	0.432098	30.8311	28.2067		17.2317
	hd			12.333	13.59	1.257	13.4724	1.1394	12.8881	0.5551	51.2814	9.35561		12.7121	0.3791	0.176	0.400259	35.1289	31.706		13.5897
	he			14.4483	16.0457	1.5974	15.9018	1.4535	15.1357	0.6874	52.7073	9.00839		14.9319	0.4836	0.2038	0.463482	31.8873	29.6479		15.4054
	hf			12.123	13.8024	1.6794	13.7056	1.5826	12.8355	0.7125	54.9791	5.76396		12.6361	0.5131	0.1994	0.453475	28.6538	27.986		16.367
	hg			12.2229	13.7117	1.4888	13.6258	1.4029	12.8441	0.6212	55.7203	5.76975		12.6498	0.4269	0.1943	0.441877	31.4974	31.2782		12.7823
	hh			12.7761	14.396	1.6199	14.2647	1.4886	13.4403	0.6642	55.3809	8.10544		13.2434	0.4673	0.1969	0.44779	30.0813	29.6447		14.5378
	hi			12.9959	14.6417	1.6458	14.5095	1.5136	13.6965	0.7006	53.713	8.03257		13.4888	0.4929	0.2077	0.472351	31.2071	29.646		15.0799
	hj			11.4174	13.3148	1.8974	13.1518	1.7344	12.2684	0.851	50.934	8.5907		12.0031	0.5857	0.2653	0.603345	34.787	31.1751		14.279
	hk			11.8265	13.6554	1.8289	13.4926	1.6661	12.6375	0.811	51.3234	8.90153		12.4009	0.5744	0.2366	0.538076	32.2955	29.1739		16.381
	hl			12.4743	13.9682	1.4939	13.834	1.3597	13.1311	0.6568	51.6952	8.9832		12.9542	0.4799	0.1769	0.402306	29.5878	26.9336		18.7169
	hm			12.2887	14.5287	2.24	14.4107	2.122	13.742	1.4533	31.5127	5.26786		13.2538	0.9651	0.4882	1.11026	52.3216	33.5925		16.1657
	hn			12.8314	14.4631	1.6317	14.3442	1.5128	13.6039	0.7725	48.9357	7.28688		13.3657	0.5343	0.2382	0.541714	35.8087	30.835		15.2555
	ho			12.8228	14.4017	1.5789	14.2739	1.4511	13.5703	0.7475	48.4874	8.09424		13.3486	0.5258	0.2217	0.50419	34.7454	29.6589		16.7673
	hp			11.9465	13.8069	1.8604	13.6282	1.6817	12.7972	0.8507	49.4143	9.60546		12.5433	0.5968	0.2539	0.577419	34.3355	29.846		16.2503
	hq			12.7477	14.3537	1.606	14.1998	1.4521	13.483	0.7353	49.363	9.58281		13.2738	0.5261	0.2092	0.475763	32.7638	28.451		17.8732
	hr			12.0898	13.8763	1.7865	13.7211	1.6313	12.905	0.8152	50.0276	8.68738		12.6649	0.5751	0.2401	0.546035	33.4724	29.4529		16.5
	hs			11.5839	14.3424	2.7585	14.225	2.6411	13.4972	1.9133	27.5567	4.25594		12.9332	1.3493	0.564	1.28265	48.5649	29.4779		23.8784
	ht			11.4955	13.4829	1.9874	13.3316	1.8361	12.4925	0.997	45.7001	7.61296		12.2098	0.7143	0.2827	0.642916	35.0153	28.3551		19.2846
	hu			13.6959	15.7038	2.0079	15.5478	1.8519	14.7249	1.029	44.4354	7.76931		14.4118	0.7159	0.3131	0.712052	38.4498	30.4276		17.1147
	hv			12.8362	14.3806	1.5444	14.2476	1.4114	13.552	0.7158	49.2844	8.61176		13.3211	0.4849	0.2309	0.525113	37.2051	32.2576		13.5105
	hw			14.9243	16.3889	1.4646	16.2648	1.3405	15.6731	0.7488	44.1402	8.4733		15.4243	0.5	0.2488	0.565821	42.2097	33.2265		13.6501
	hx			12.6605	14.7569	2.0964	14.6081	1.9476	13.8342	1.1737	39.7361	7.09788		13.5271	0.8666	0.3071	0.698407	35.8599	26.1651		24.404
	hy			11.8422	13.4016	1.5594	13.2659	1.4237	12.5164	0.6742	52.6445	8.70206		12.2917	0.4495	0.2247	0.511013	35.8933	33.3284		11.4622
	hz			14.0583	15.6575	1.5992	15.5478	1.4895	14.9598	0.9015	39.4763	6.85968		14.6231	0.5648	0.3367	0.765723	51.4081	37.3489		9.1156
	4a			12.312	13.9575	1.6455	13.8358	1.5238	13.0841	0.7721	49.3306	7.39593		12.8685	0.5565	0.2156	0.490318	32.1773	27.9238		18.4921
	4b			11.5005	13.0536	1.5531	12.931	1.4305	12.1714	0.6709	53.1003	7.89389		11.9954	0.4949	0.176	0.400259	27.9804	26.2334		18.9193
	4c			12.2226	13.6707	1.4481	13.5738	1.3512	12.9006	0.678	49.8224	6.69153		12.7008	0.4782	0.1998	0.454385	33.6283	29.469		16.5494
	4d			14.0689	15.7266	1.6577	15.5872	1.5183	14.7926	0.7237	52.3348	8.40924		14.5964	0.5275	0.1962	0.446198	29.388	27.1107		18.2771
	4e			11.5063	12.9851	1.4788	12.8614	1.3551	12.155	0.6487	52.129	8.36489		11.9604	0.4541	0.1946	0.442559	32.6588	29.9985		15.2122
	4f			12.9592	14.8178	1.8586	14.6709	1.7117	13.8108	0.8516	50.2483	7.9038		13.5745	0.6153	0.2363	0.537393	31.3953	27.7478		18.3564
	4g			15.235	16.873	1.638	16.7513	1.5163	15.9887	0.7537	50.2935	7.42979		15.7536	0.5186	0.2351	0.534664	35.2611	31.1928		14.4454
	4h			11.6255	13.2883	1.6628	13.1699	1.5444	12.3858	0.7603	50.7705	7.12052		12.1631	0.5376	0.2227	0.506464	32.7936	29.2911		16.4359
	4i			12.2414	13.8117	1.5703	13.6791	1.4377	12.9478	0.7064	50.866	8.44425		12.7441	0.5027	0.2037	0.463255	32.2219	28.8364		16.9121
	4j			13.8787	15.5304	1.6517	15.4026	1.5239	14.6162	0.7375	51.6044	7.73748		14.4015	0.5228	0.2147	0.488271	32.0409	29.1119		16.3547
	4k			11.3185	13.0086	1.6901	12.8887	1.5702	12.1157	0.7972	49.2294	7.09425		11.8943	0.5758	0.2214	0.503508	32.0665	27.7722		18.7041
	4l			13.7721	15.6129	1.8408	15.4889	1.7168	14.6412	0.8691	49.3767	6.7362		14.3906	0.6185	0.2506	0.569915	33.1963	28.8344		17.4269
	4m			11.9421	13.6714	1.7293	13.5481	1.606	12.6947	0.7526	53.1382	7.13005		12.4617	0.5196	0.233	0.529889	32.9943	30.9593		13.8675
	4n			13.0551	14.9017	1.8466	14.7672	1.7121	13.8532	0.7981	53.3847	7.28366		13.6152	0.5601	0.238	0.54126	31.6138	29.8208		15.0015
	4o			11.5881	13.6141	2.026	13.4681	1.88	12.6131	1.025	45.4787	7.20632		12.334	0.7459	0.2791	0.634729	33.7622	27.2293		20.7591
	4p			13.3913	14.8232	1.4319	14.7462	1.3549	14.1308	0.7395	45.4203	5.37747		13.9152	0.5239	0.2156	0.490318	36.1885	29.1548		18.3912
	4q			12.1147	13.7939	1.6792	13.7037	1.589	12.9713	0.8566	46.0919	5.37161		12.699	0.5843	0.2723	0.619265	38.972	31.7885		14.9361
	4r			12.3697	14.1397	1.77	13.9929	1.6232	13.1517	0.782	51.8236	8.29379		12.9054	0.5357	0.2463	0.560135	34.5081	31.4962		13.6683
	4s			12.6146	14.3472	1.7326	14.193	1.5784	13.4058	0.7912	49.8733	8.89992		13.1387	0.5241	0.2671	0.607439	38.4845	33.7588		11.6422
	4t			12.0493	13.6621	1.6128	13.526	1.4767	12.785	0.7357	50.1795	8.43874		12.5745	0.5252	0.2105	0.478719	32.4182	28.6122		17.4024
	4u			11.8248	13.6612	1.8364	13.5129	1.6881	12.6652	0.8404	50.2162	8.07558		12.4518	0.627	0.2134	0.485314	28.7491	25.3927		21.0346
	4v			14.1255	15.7321	1.6066	15.5908	1.4653	14.8617	0.7362	49.7577	8.79497		14.6536	0.5281	0.2081	0.473261	32.2979	28.2668		17.9444
	4w			11.7097	13.2555	1.5458	13.1256	1.4159	12.3439	0.6342	55.2087	8.40342		12.192	0.4823	0.1519	0.345451	24.398	23.9514		20.3933
	4x			11.3144	13.4986	2.1842	13.3492	2.0348	12.2596	0.9452	53.5483	6.84003		12.0083	0.6939	0.2513	0.571506	28.0866	26.587		18.3651
	4y			12.8872	14.3655	1.4783	14.2814	1.3942	13.5439	0.6567	52.8977	5.68897		13.387	0.4998	0.1569	0.356822	25.5933	23.8922		21.509
	4z			11.3967	14.2191	2.8224	14.0874	2.6907	13.3734	1.9767	26.5358	4.66624		12.867	1.4703	0.5064	1.15165	42.8013	25.6185		30.6628
total	H400	533.07	120.06	742.258	840.859	98.6016	833.169	90.9119	788.959	46.7017	49.5129	7.96496	49.5129	775.305	33.0479	13.6538	31.0515	33.6485	29.2546	29.3105	16.8386	49.5129	6.00433	33.6485	5.38965	16.8386	3.343	100
H550	h5A			11.4784	14.0502	2.5718	14.0025	2.5241	13.5892	2.1108	16.3742	1.85473	14.1058	12.9868	1.5084	0.6024	1.36998	54.2759	28.5389	28.7785	29.3499	14.1058	1.34328	56.222	2.57208	29.6722	2.21073	100			aef 10/01
	h5b			12.3652	15.7664	3.4012	15.7107	3.3455	15.2225	2.8573	14.5927	1.63766		14.3493	1.9841	0.8732	1.98583	59.3583	30.5603		26.049
	h5c			12.7878	17.2345	4.4467	17.1574	4.3696	16.5123	3.7245	14.7634	1.73387		15.4668	2.679	1.0455	2.37768	54.414	28.0709		30.8226
	h5d			12.0702	15.557	3.4868	15.5111	3.4409	15.0783	3.0081	12.5781	1.31639		14.2219	2.1517	0.8564	1.94762	56.6022	28.4698		30.8197
	h5e			14.8751	19.1601	4.285	19.0989	4.2238	18.5628	3.6877	12.6924	1.42824		17.4567	2.5816	1.1061	2.51549	59.5552	29.9943		27.7524
	h5f			11.7016	17.9148	6.2132	17.8185	6.1169	17.0027	5.3011	13.3368	1.54993		15.4827	3.7811	1.52	3.45678	56.512	28.6733		30.1512
	h5g			11.9267	19.0208	7.0941	18.8974	6.9707	17.8934	5.9667	14.4031	1.73947		16.2739	4.3472	1.6195	3.68307	52.8364	27.1423		32.7605
total	H550	61.41	31.8	87.205	118.704	31.4988	118.197	30.9915	113.861	26.6562	14.1058	1.60861	14.1058	106.238	19.0331	7.6231	2.47664	56.222	28.7785	28.7785	29.6722	14.1058	1.34328	56.222	2.57208	29.6722	2.21073	100
H700	h7a			11.3673	13.198	1.8307	13.1106	1.7433	12.5655	1.1982	31.2683	4.77413	26.7976	12.1485	0.7812	0.417	0.948341	54.3992	34.8022	34.3074	14.3325	26.7976	8.01113	57.1018	7.07995	16.1006	3.65633	100			aef 10/01
	h7b			12.2175	13.5974	1.3799	13.5108	1.2933	13.0238	0.8063	37.6556	6.27582		12.7133	0.4958	0.3105	0.706139	54.5998	38.5092		7.7446
	h7c			13.8321	16.0741	2.242	15.9643	2.1322	15.3066	1.4745	30.8461	4.89741		14.8549	1.0228	0.4517	1.02726	48.1782	30.6341		20.9757
	h7d			13.0413	16.1027	3.0614	16.0415	3.0002	15.4893	2.448	18.4054	1.99909		14.624	1.5827	0.8653	1.96787	65.5911	35.3472		16.0034
	h7e			11.7551	13.2606	1.5055	13.1713	1.4162	12.662	0.9069	35.9624	5.93158		12.3624	0.6073	0.2996	0.68135	48.1112	33.0356		15.9264
	h7f			12.1585	14.7948	2.6363	14.6826	2.5241	13.979	1.8205	27.8753	4.25596		13.3759	1.2174	0.6031	1.37157	54.339	33.1283		17.7857
	h7g			12.4525	15.9333	3.4808	15.8013	3.3488	14.9434	2.4909	25.6181	3.79223		14.0938	1.6413	0.8496	1.93216	57.6971	34.1082		16.6848
	h7h			11.3942	14.5883	3.1941	14.5227	3.1285	14.0224	2.6282	15.9917	2.05379		13.0978	1.7036	0.9246	2.10273	67.2119	35.18		16.7964
	h7i			12.4472	16.761	4.3138	16.672	4.2248	15.9303	3.4831	17.5559	2.06315		14.7453	2.2981	1.185	2.69493	63.7883	34.0214		18.6559
total	H700	103.67	24.4	110.666	134.31	23.6445	133.477	22.8114	127.922	17.2566	26.7976	4.0048	26.7976	122.016	11.3502	5.9064	1.49248	57.1018	34.3074	34.3074	16.1006	26.7976	8.01113	57.1018	7.07995	16.1006	3.65633	100
